# Supplementary material for: Mental Health Clinicians’ Motivation to Invest in Training: Results From a Practice-Based Research Network Survey
Source: Atypon-hosted journal article supplement (doi:10.1176/appi.ps.003602012), 2013-08-01
Supplement: 816_ds001.pdf [file 816_ds001.pdf]

**Online Data Supplement for  
Mental Health Clinicians' Motivation to Invest in Training: Results from a  
Practice-Based Research Network Survey**

**Motivators**

| <b>Motivator (I am motivated to attend if...)</b>                       | <b>Mean</b> | <b>SD</b> |
|-------------------------------------------------------------------------|-------------|-----------|
| I thought the training was a good fit for the clients I see             | 3.75        | .46       |
| Intervention being taught could benefit my clients                      | 3.62        | .61       |
| I received continuing education credits                                 | 3.59        | .59       |
| Skills being taught would apply to a lot of my current clients          | 3.58        | .58       |
| Training was aimed at advanced clinicians with high levels of skill     | 3.23        | .72       |
| Training matched my own therapy style or orientation                    | 3.16        | .70       |
| Skills being taught were new and different to me                        | 3.15        | .69       |
| Training allowed me to expand my skills to a new client population      | 3.07        | .78       |
| Training provided coaching or supervision from an experienced therapist | 2.97        | .90       |
| Training helped set me apart from other therapists                      | 2.76        | .87       |
| Training would make me more marketable for future jobs                  | 2.63        | .96       |
| Skills being taught were easy to learn                                  | 2.47        | .86       |
| Training enhanced my ability to get more clients                        | 2.38        | .95       |
| Training was available over the Internet                                | 2.22        | 1.01      |
| Training would position me well at my agency                            | 2.20        | .99       |
| I was paid to attend the training                                       | 2.20        | 1.07      |
| It would allow me to receive more money for my services                 | 2.00        | .94       |
| Training was aimed at beginning clinicians                              | 1.55        | .66       |

*Note.* (1= "Very unlike me" and 4= "Very much like me")

**Percentage of respondents who endorsed the following deal breakers**

| <b>Deal Breaker (I would not attend if...)</b>                                     | <b>% Listed</b> |
|------------------------------------------------------------------------------------|-----------------|
| Didn't think the training was a good fit for the kinds of clients that I see       | 61.95           |
| Didn't think the skills or intervention being taught would benefit my clients      | 61.32           |
| Training was aimed at beginning clinicians                                         | 53.14           |
| Skills being taught would not apply to many of my current clients                  | 44.65           |
| Continuing education credits were not available                                    | 43.08           |
| Skills or intervention being taught required me to purchase new equipment          | 28.30           |
| Training was only provided over the internet                                       | 25.79           |
| Training involved coaching or supervision over the internet                        | 24.21           |
| Training involved following a treatment manual session by session                  | 23.27           |
| Skills or intervention being taught would not be valued at my agency               | 22.34           |
| Could not bill for providing the intervention in which I would be trained          | 20.13           |
| Training did not match my own therapy style or orientation                         | 19.81           |
| Training involved taping or being observed by another clinician                    | 15.72           |
| Training required me to purchase a treatment manual                                | 13.84           |
| Training could only be completed by taking time off from work                      | 7.86            |
| Skills or intervention being taught would be difficult for me to learn             | 6.60            |
| Training involved being coached or supervised by another clinician                 | 6.29            |
| Training did not allow me to charge or receive more money for my services          | 5.97            |
| Training did not enhance my ability to get more clients                            | 5.35            |
| Had to pay in order to attend the training                                         | 5.03            |
| Skills taught were very new and different than what I have already been trained in | 1.89            |
| Training was aimed at advanced clinicians                                          | .31             |
